# Supplementary material for: Sodium-Glucose Cotransporter-2 Inhibitors at Discharge from Cardiology Hospitalization Department: Decoding A New Clinical Scenario
Source: PubMed Central journal article supplement (PMC7464502; doi:10.3390/jcm9082600), 2020-08-11
Supplement: jcm-09-02600-s001.pdf [file jcm-09-02600-s001.pdf]

## Supplementary Materials:

**Table S1.** Procedures during baseline assessment and follow-up (6, 12, 18 months after hospital discharge):

| Procedures:                  | Timeline:              | Description of Procedures:                                                                                                                                                                                                                                                                                                             |
|------------------------------|------------------------|----------------------------------------------------------------------------------------------------------------------------------------------------------------------------------------------------------------------------------------------------------------------------------------------------------------------------------------|
| Clinical characteristics     | Baseline               | Age, sex, race, cardiovascular risk factors, prior cardiovascular events (coronary artery disease, peripheral artery disease, cerebrovascular disease), history of heart failure, duration of type 2 diabetes, history of retinopathy, history of kidney chronic disease, cardiovascular therapies, diagnosis at cardiology discharge. |
| Anthropometric parameters    | Baseline and follow-up | Weight, height, body mass index <sup>φ</sup> .                                                                                                                                                                                                                                                                                         |
| Blood pressure               | Baseline and follow-up | Systolic and diastolic blood pressure.                                                                                                                                                                                                                                                                                                 |
| Laboratory tests             | Baseline and follow-up | Blood plasma (fasting plasma glucose (FPG), urea, creatinine, sodium, potassium, estimated glomerular filtration rate (eGFR) <sup>φ</sup> )<br>Urine (albuminuria)                                                                                                                                                                     |
| Glycemic Profile             | Baseline and follow-up | FPG, Glycated hemoglobin (%), glucose-lowering therapies.                                                                                                                                                                                                                                                                              |
| Adherence to the GLA regimen | Follow-up              | Discontinuation (yes/no) and reason of discontinuation                                                                                                                                                                                                                                                                                 |
| Clinical outcomes            | Follow-up              | Death from any cause.<br>Cardiovascular death.<br>Cardiovascular readmission (hospitalization).                                                                                                                                                                                                                                        |
| Safety outcomes              | Follow-up              | ≥40% decrease in basal eGFR <sup>φ</sup> with <60 ml/min/1.73 m <sup>2</sup> , end-stage renal disease, or death from renal cause.<br>Hospitalization for renal cause.                                                                                                                                                                 |

<sup>φ</sup> The body-mass index is the weight in kilograms divided by the square of the height in meters. <sup>φ</sup> Estimated glomerular filtration rate (eGFR): calculated by means of the Chronic Kidney Disease Epidemiology Collaboration equation. eGFR: estimated glomerular filtration rate; FPG: fasting plasma glucose.

**Table S2:** Detailed list of patients who died in the propensity-score matched cohort during follow-up.

| Age (Years) | Sex | Prior History    | LVEF (%) | GLD Treatment      | Study Group | Survival             |               |                |
|-------------|-----|------------------|----------|--------------------|-------------|----------------------|---------------|----------------|
|             |     |                  |          |                    |             | Free of Death (Days) | Type of Death | Cause of Death |
| 81          | M   | Inferior MI      | 60       | Metformin<br>DPP4i | Non-SGLT-2i | 223                  | CV: non-HF    | ACS            |
| 86          | M   | Anterior MI, AF  | 60       | Metformin          | Non-SGLT-2i | 31                   | CV: non-HF    | Sudden death   |
| 74          | F   | Ischemic dilated | 35       |                    | Non-        | 474                  | CV: HF        | HF             |

|    |   | cardiomyopathy                     |    | Metformin<br>DPP4i<br>Insulin | SGLT-2i         |     |           |                                |
|----|---|------------------------------------|----|-------------------------------|-----------------|-----|-----------|--------------------------------|
| 61 | M | Anterior MI                        | 45 | Metformin<br>GLP1a            | Non-<br>SGLT-2i | 62  | CV: HF    | HF                             |
| 70 | M | Stable angina,<br>COPD             | 60 | Metformin                     | Non-<br>SGLT-2i | 18  | CV non-HF | Acute<br>pulmonary<br>embolism |
| 83 | M | Stable angina, AF                  | 60 | Metformin                     | Non-<br>SGLT-2i | 42  | CV non-HF | ACS                            |
| 60 | M | Inferior MI                        | 45 | Metformin                     | Non-<br>SGLT-2i | 169 | Non CV    | Colorectal<br>cancer           |
| 83 | F | Stable angina,<br>COPD             | 60 | Metformin                     | Non-<br>SGLT-2i | 103 | Non CV    | Pneumonia                      |
| 83 | F | Ischemic dilated<br>cardiomyopathy | 25 | Metformin                     | Non-<br>SGLT-2i | 87  | CV: HF    | HF                             |

ACS: acute coronary syndrome, AF: atrial fibrillation, COPD: chronic obstructive pulmonary disease, CV: cardiovascular; DPP4i: dipeptidyl peptidase 4 inhibitors, F: female, HF: heart failure, M: male, MI: myocardial infarction, SGLT2i: sodium-glucose cotransporter-2 inhibitors.

**Table S3:** Efficacy clinical outcomes for patients in the propensity-score matched cohort by groups (SGLT-2 inhibitors/non-SGLT-2 inhibitors).

| Efficacy Clinical Outcome                                            | SGLT-2 Inhibitors<br>(N=38) | Non-SGLT-2<br>Inhibitors (N=38) | <i>p</i> -Value |
|----------------------------------------------------------------------|-----------------------------|---------------------------------|-----------------|
| Any cause of death                                                   | 0                           | 9 (24%)                         | 0.001           |
| Cardiovascular death                                                 | 0                           | 7 (18%)                         | 0.005           |
| • Non heart failure                                                  | 0                           | 4 (11%)                         | 0.04            |
| • Heart failure                                                      | 0                           | 3 (8%)                          | 0.077           |
| Re-admission (all causes)                                            | 9 (24%)                     | 15 (39%)                        | 0.09            |
| Cardiovascular Re-admission                                          | 7 (18%)                     | 10 (26%)                        | 0.349           |
| • Hospitalization for<br>myocardial infarction or<br>ischemic stroke | 6 (16%)                     | 6 (16%)                         | 1               |
| • Hospitalization for heart<br>failure                               | 1 (2%)                      | 4 (11%)                         | 0.358           |
| Re-admission for renal cause                                         | 0                           | 2 (5%)                          | 0.16            |
| Combined clinical outcome *                                          | 7 (18%)                     | 16 (42%)                        | 0.02            |

\* Combined clinical outcome was defined as rate of death or readmission for cardiovascular cause.  
CV: cardiovascular; SGLT2: sodium-glucose cotransporter-2.

**Table S4:** Other clinical outcomes during follow up by groups (SGLT-2 inhibitors group and Non-SGLT-2 inhibitors group).

| <b>Efficacy Clinical Outcomes</b>  | <b>SGLT-2 Inhibitors, Baseline</b> | <b>SGLT-2 Inhibitors, Follow-Up</b> | <b>p-Value</b> | <b>Non-SGLT-2 Inhibitors, Baseline</b> | <b>Non-SGLT-2 Inhibitors, Follow-Up</b> | <b>p-Value</b> |
|------------------------------------|------------------------------------|-------------------------------------|----------------|----------------------------------------|-----------------------------------------|----------------|
| eGFR (ml/min/1.73 m <sup>2</sup> ) | 77.343 (+/- 18.148)                | 77.455 (+/- 21.315)                 | 0.253          | 71.886 (± 21.351)                      | 63.966 (+/- 25.29)                      | 0.028          |
| Systolic blood pressure (mmHg)     | 124.8 (+/- 16.3)                   | 126.05 (+/-15.3)                    | 0.731          | 125.19 (+/- 13.7)                      | 127.5 (+/-15.2)                         | 0.954          |
| Diastolic blood pressure (mmHg)    | 69.9 (+/- 8.9)                     | 70.5 (+/- 9.2)                      | 0.766          | 68.6 (+/-13.15)                        | 72.1 (+/- 11.6)                         | 0.221          |
| Weight (kg)                        | 81.68 (+/-13.1)                    | 79.1 (+/-12.4)                      | 0.001          | 77.43 (+/- 17.4)                       | 77.9 (+/- 16.4)                         | 0.369          |
| Glycated hemoglobin (%)            | 7.79 (+/-1.59)                     | 7.20 (+/-0.94)                      | 0.1            | 7.29 (+/- 1.62)                        | 7.20 (+/-1.51)                          | 0.818          |

eGFR: estimated glomerular filtration rate; SGLT-2: sodium-glucose cotransporter-2.
